# Supplementary material for: Unifying machine learning and quantum chemistry with a deep neural network for molecular wavefunctions
Source: PubMed Central journal article supplement (PMC6858523; doi:10.1038/s41467-019-12875-2), 2019-11-15
Supplement: 41467_2019_12875_MOESM1_ESM.pdf [file 41467_2019_12875_MOESM1_ESM.pdf]

**Supplementary Information: Unifying machine learning and quantum chemistry with  
a deep neural network for molecular wavefunctions**

Schütt et al.

Supplementary Table 1: **Overview of training settings for each data set.** The number of references calculations of the training, validation and test sets are given as well as the size of the mini batch  $n_{\text{batch}}$ , the initial learning rate  $lr_{\text{init}}$  and the number of epochs  $t_{\text{patience}}$  without improvement of the validation error before the learning rate was decreased.

| Data set           | $n_{\text{train}}$ | $n_{\text{validate}}$ | $n_{\text{test}}$ | $n_{\text{batch}}$ | $lr_{\text{init}}$ | $t_{\text{patience}}$ |
|--------------------|--------------------|-----------------------|-------------------|--------------------|--------------------|-----------------------|
| H <sub>2</sub> O   | 500                | 500                   | 4000              | 32                 | $1 \cdot 10^{-4}$  | 50                    |
| Ethanol (HF / DFT) | 25000              | 500                   | 4500              | 32                 | $1 \cdot 10^{-4}$  | 15                    |
| Malondialdehyde    | 25000              | 500                   | 1478              | 32                 | $1 \cdot 10^{-4}$  | 15                    |
| Uracil             | 25000              | 500                   | 4500              | 48                 | $1 \cdot 10^{-4}$  | 15                    |

Supplementary Table 2: **Predictions errors of SchNOorb.** Mean absolute errors for the Hamiltonians, overlaps, energies  $\epsilon$  and coefficients of occupied MOs as well as the total energy are given.

| Data set         | level of theory | basis set | H [eV] | S        | $\epsilon$ [eV] | $\psi$ | total energy [eV] |
|------------------|-----------------|-----------|--------|----------|-----------------|--------|-------------------|
| H <sub>2</sub> O | DFT             | def2svp   | 0.0045 | 7.91e-05 | 0.0076          | 1.00   | 0.001435          |
| Ethanol          | HF              | def2svp   | 0.0079 | 7.50e-05 | 0.0106          | 1.00   | 0.000378          |
| Ethanol          | DFT             | def2svp   | 0.0051 | 6.78e-05 | 0.0091          | 1.00   | 0.000361          |
| Ethanol          | DFT             | def2tzvp  | 0.0083 | 9.59e-05 | 0.4775          | 0.70   | *0.001533         |
| Malondialdehyde  | DFT             | def2svp   | 0.0052 | 6.73e-05 | 0.0109          | 0.99   | 0.000353          |
| Uracil           | DFT             | def2svp   | 0.0062 | 8.24e-05 | 0.0479          | 0.90   | 0.000848          |

\* trained without atomic forces

Supplementary Table 3: **Errors for Loewdin population analysis.** Mean absolute errors for the predicted partial charges and bond orders.

| Dataset         | level of theory | basis set | partial charges | bond orders |
|-----------------|-----------------|-----------|-----------------|-------------|
| Water           | DFT             | def2svp   | 0.002           | 0.001       |
| Ethanol         | DFT             | def2svp   | 0.002           | 0.001       |
| Ethanol         | HF              | def2svp   | 0.002           | 0.001       |
| Malondialdehyde | DFT             | def2svp   | 0.004           | 0.001       |
| Uracil          | DFT             | def2svp   | 0.047           | 0.006       |

Supplementary Table 4: **Errors for molecular properties.** Mean absolute errors of the dipole and quadrupole moments computed for the predicted wavefunction coefficients.

| Dataset         | level of theory | basis set | dipole moment [D] | quadrupole moment [D Å] |
|-----------------|-----------------|-----------|-------------------|-------------------------|
| Water           | DFT             | def2svp   | 0.0072            | 0.0061                  |
| Ethanol         | DFT             | def2svp   | 0.0262            | 0.0355                  |
| Ethanol         | HF              | def2svp   | 0.0161            | 0.0218                  |
| Malondialdehyde | DFT             | def2svp   | 0.0536            | 0.0575                  |
| Uracil          | DFT             | def2svp   | 1.2762            | 1.8703                  |

Supplementary Table 5: **Errors for MP2 energies.** Mean absolute errors of the Hartree-Fock energy, MP2 correlation energy and total MP2 energy (HF + MP2 correlation) computed for the HF ethanol dataset based on the predicted wavefunction coefficients. In addition, MAEs relative to the average energy values are provided in percent.

| Energy component | MAE [eV] | MAE [%] |
|------------------|----------|---------|
| HF               | 0.0214   | 0.01    |
| MP2 correlation  | 0.0831   | 17.19   |
| HF + MP2         | 0.0926   | 0.06    |

Supplementary Table 6: **Duration of dataset generation as well as training and prediction using SchNOrb.** Each model was trained using 25,000 training examples on a Nvidia P100 GPU. The uracil model was trained on two P100 using data parallelism.

| Data set        | reference calculations [h] | training [h] | ML prediction [s] | QC calculation [s] | speed-up |
|-----------------|----------------------------|--------------|-------------------|--------------------|----------|
| Ethanol (HF)    | 65                         | 87           | 0.033             | 9.1                | 276x     |
| Ethanol (DFT)   | 157                        | 82           | 0.033             | 22.2               | 673x     |
| Malondialdehyde | 309                        | 71           | 0.034             | 43.6               | 1282x    |
| Uracil          | 626                        | 80           | 0.038             | 88.4               | 2326x    |

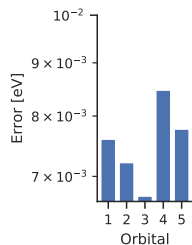(a) H<sub>2</sub>O, DFT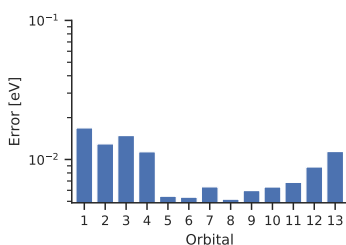

(b) Ethanol, DFT

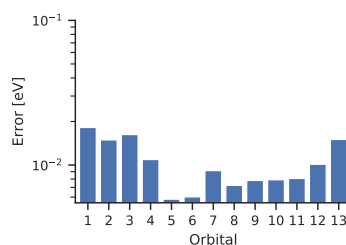

(c) Ethanol, Hartree-Fock

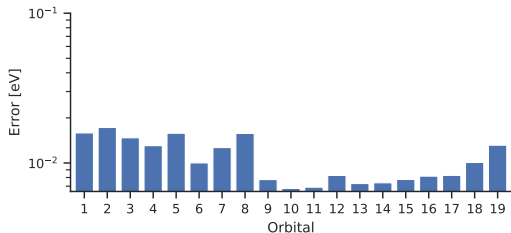

(d) Malonaldehyde, DFT

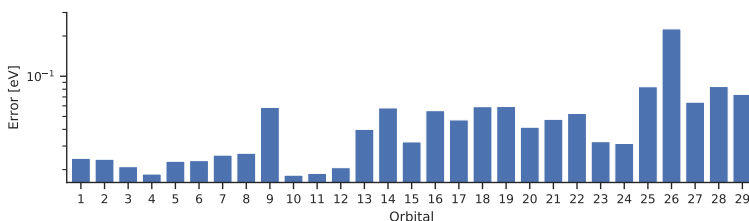

(e) Uracil, DFT

Supplementary Figure 1: **Mean absolute errors of energies separate for each occupied MO.** (a) H<sub>2</sub>O, (b) Ethanol, DFT, (c) Ethanol, Hartree-Fock, (d) Malonaldehyde, DFT, (e) Uracil, DFT .

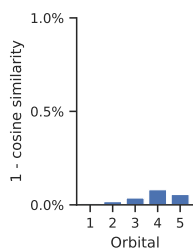(a) H<sub>2</sub>O, DFT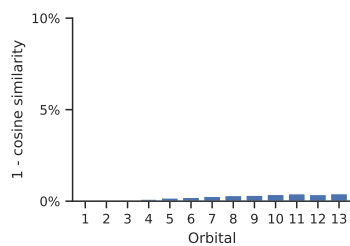

(b) Ethanol, DFT

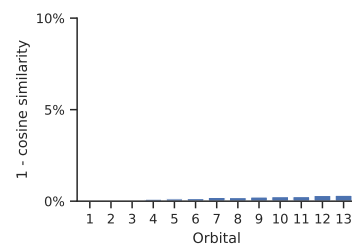

(c) Ethanol, Hartree-Fock

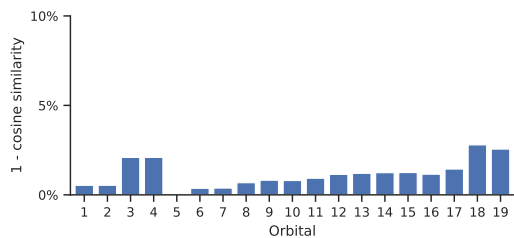

(d) Malonaldehyde, DFT

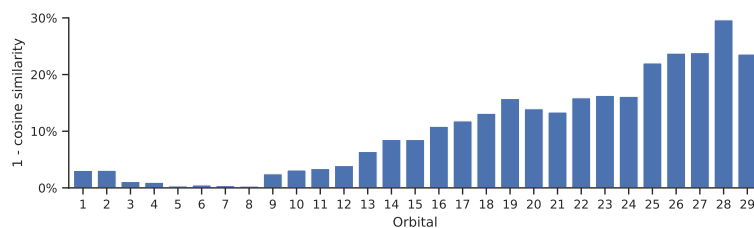

(e) Uracil, DFT

Supplementary Figure 2: **Mean cosine distances of coefficient vectors separate for each occupied MO.** The given cosine distances are equivalent to 1 - cosine similarity. (a) H<sub>2</sub>O, (b) Ethanol, DFT, (c) Ethanol, Hartree-Fock, (d) Malonaldehyde, DFT, (e) Uracil, DFT.

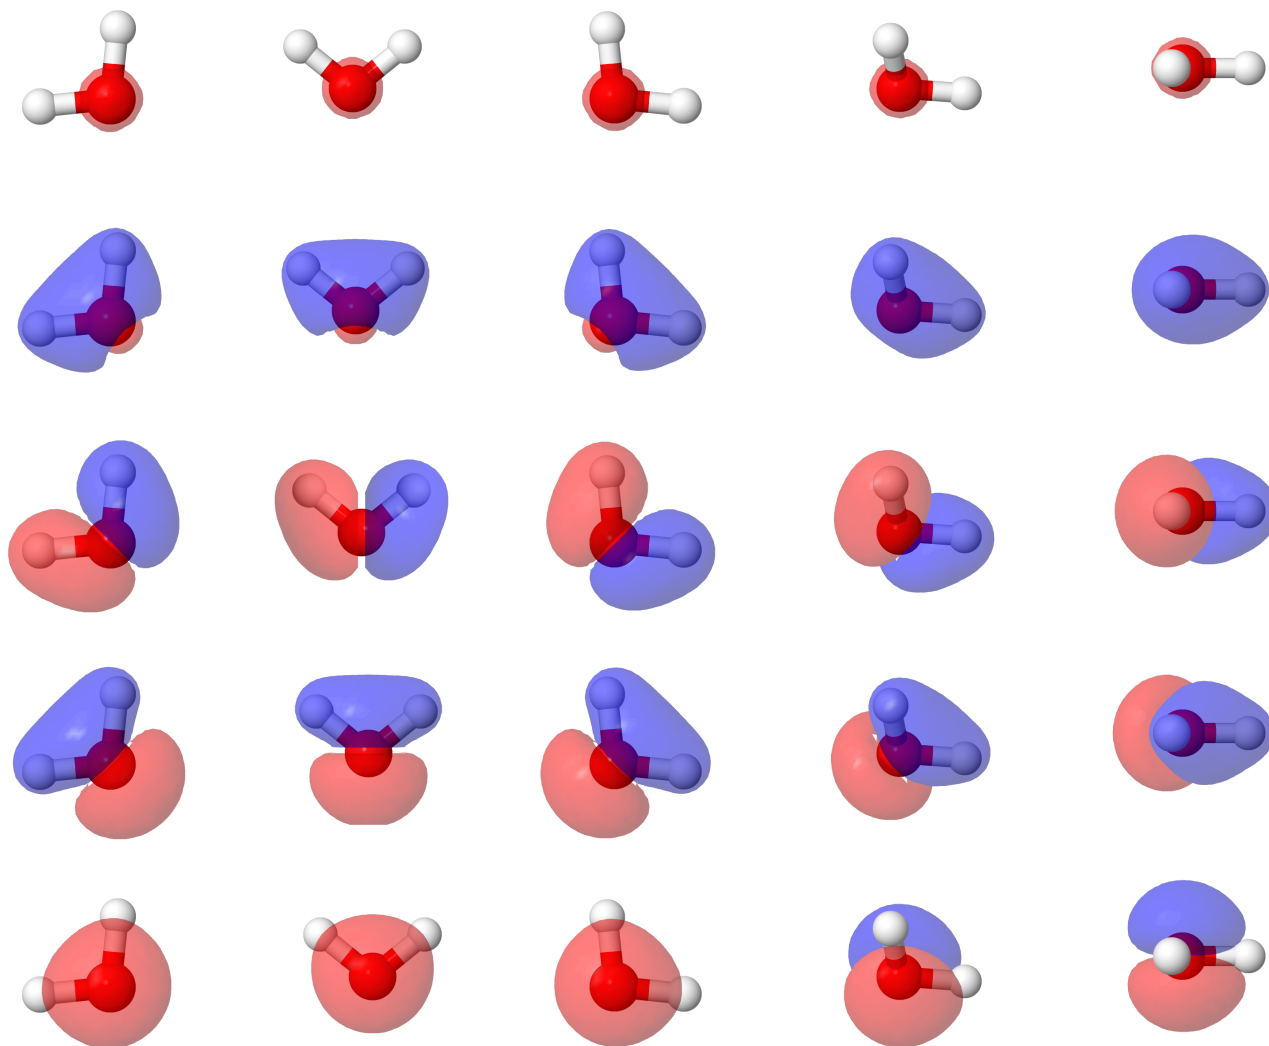

Supplementary Figure 3: **Rotations of H<sub>2</sub>O and its predicted MOs.** Each row corresponds to an MO. The learned orbitals are covariant under rotation of the molecule.

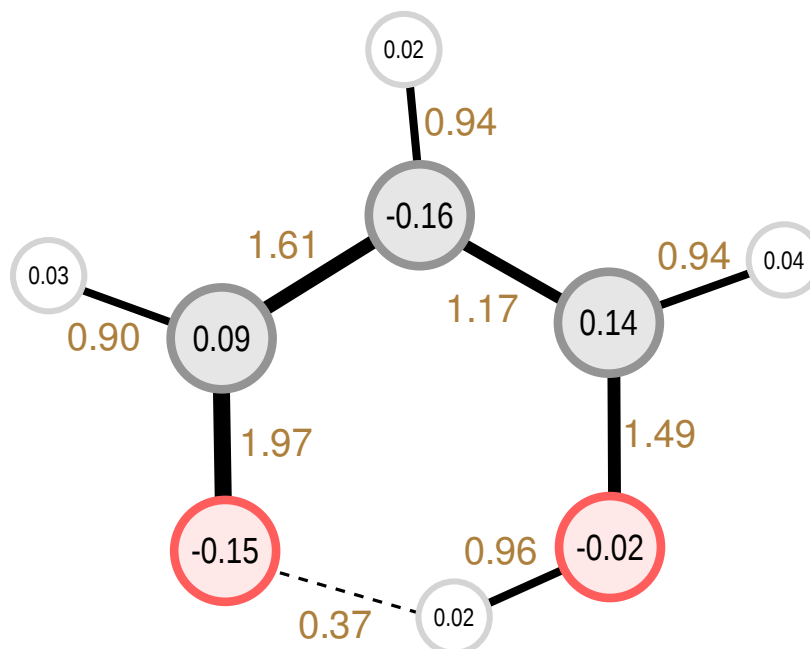

Supplementary Figure 4: **Loewdin population analysis for malondialdehyde.** The SchNOorb predictions of partial charges and bond orders for a randomly selected configuration of malondialdehyde are shown.

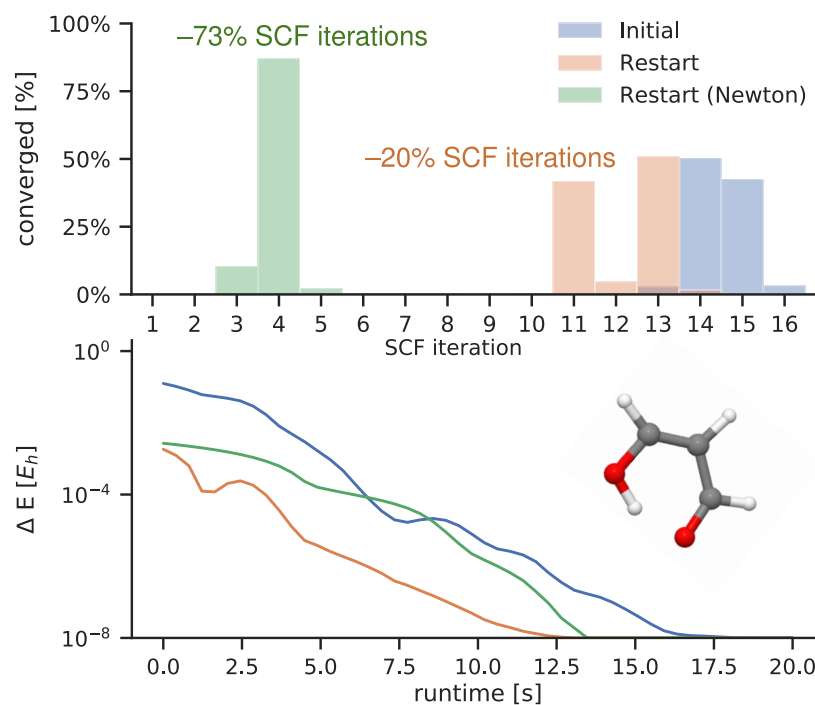

Supplementary Figure 5: **Accelerated SCF convergence of malondialdehyde.** The predicted MO coefficients for the malondialdehyde configurations from the test set are used as a wave function guess to obtain accurate solutions from DFT. (top panel) Histogram of SCF calculations vs. number of SCF iterations shows that this reduces the required SCF iterations by 73%. (bottom panel) Logarithmic energy change per SCF step vs. runtime in seconds shows that it is more efficient to use the conventional SOSCF method, even though this saves only 20% of iterations for malondialdehyde.
